# Supplementary material for: Profiling of Tryptophan Metabolic Pathways in the Rat Fetoplacental Unit during Gestation
Source: MDPI journal article supplement (doi:10.3390/ijms21207578), 2020-10-14
Supplement: s1 [file s1]

# Profiling of tryptophan metabolic pathways in the rat fetoplacental unit during gestation

## SUPPLEMENTARY INFORMATION

**Table 1.** List of Predesigned Probe Assays (FAM and HEX) Used in qPCR and ddPCR Analysis. All Primers Were Obtained from Thermo Fisher Scientific, Waltham, MA, USA, except the HEX Assay, Which Was Obtained from BioRad, Hercules, CA, USA.

| Gene symbol            | Gene name                                                                    | Assay ID                              |
|------------------------|------------------------------------------------------------------------------|---------------------------------------|
| <i>Tph1</i>            | tryptophan hydroxylase 1                                                     | Rn01476867_m1                         |
| <i>Tph2</i>            | tryptophan hydroxylase 2                                                     | Rn00598017_m1                         |
| <i>Mao-a</i>           | monoamine oxidase A                                                          | Rn01430950_m1                         |
| <i>Mao-b</i>           | monoamine oxidase B                                                          | Rn00566203_m1                         |
| <i>Pts</i>             | 6-pyruvoyltetrahydropterin synthase                                          | Rn00568123_m1                         |
| <i>Spr</i>             | sepiapterin reductase                                                        | Rn01425678_g1                         |
| <i>Ddc</i>             | dopa decarboxylase                                                           | Rn01401189_m1                         |
| <i>Aanat</i>           | aralkylamine N-acetyltransferase                                             | Rn00664873_g1                         |
| <i>Asmt</i>            | acetylserotonin O-methyltransferase                                          | Rn00595341_m1                         |
| <i>Ido1</i>            | indoleamine 2,3-dioxygenase 1                                                | Rn01482210_m1                         |
| <i>Ido2</i>            | indoleamine 2,3-dioxygenase 2                                                | Rn01482543_m1                         |
| <i>Tdo2</i>            | tryptophan 2,3-dioxygenase                                                   | Rn00574499_m1                         |
| <i>Kmo</i>             | kynurenine 3-monooxygenase                                                   | Rn01411937_m1                         |
| <i>Kyat1</i>           | kynurenine aminotransferase 1                                                | Rn01439192_m1                         |
| <i>Kynu</i>            | Kynureninase                                                                 | Rn01449532_m1                         |
| <i>Haao</i>            | 3-hydroxyanthranilate 3,4-dioxygenase                                        | Rn01469327_m1                         |
| <i>Qprt</i>            | quinolinate phosphoribosyltransferase                                        | Rn01506918_g1                         |
| <i>Slc3a2</i>          | solute carrier family 3 member 2                                             | Rn01759899_g1                         |
| <i>Slc6a4</i>          | solute carrier family 6 member 4                                             | Rn00564737_m1                         |
| <i>Slc7a5</i>          | solute carrier family member 5                                               | Rn00569313_m1                         |
| <i>Slc7a8</i>          | solute carrier family 7 member 8                                             | Rn00584909_m1                         |
| <i>Slc22a3</i>         | solute carrier family 22 member 3                                            | Rn00570264_m1                         |
| <b>Reference genes</b> |                                                                              |                                       |
| <i>Ywhaz</i>           | tyrosine 3-monooxygenase/tryptophan 5-monooxygenase activation protein, zeta | Rn00755072_m1<br>qRnoCIP0050810 (HEX) |
| <i>Gapdh</i>           | glyceraldehyde-3-phosphate dehydrogenase                                     | Rn01775763_g1                         |

**Table 2.** List of Antibodies Used for Western Blot and Immunohistochemistry Analysis.

| Target protein     | Product name                        | Host   | Distributor                                     | Cat. No.  | Dil.   | Use |
|--------------------|-------------------------------------|--------|-------------------------------------------------|-----------|--------|-----|
| SLC6A4             | Anti-serotonin transporter antibody | Rabbit | Abcam, Cambridge, UK                            | Ab181034  | 1:500  | WB  |
| SLC6A4             | Anti-serotonin transporter antibody | Rabbit | Thermo Fisher Scientific, Waltham, MA, USA      | PA5-50624 | 1:50   | IHC |
| SL22A3             | Anti-SLC22A3/OCT3                   | Rabbit | Bioworld Technology, Inc., Bloomington, MN, USA | BS3359    | 1:500  | WB  |
| MAO-A              | Anti-monoamine oxidase              | Rabbit | Abcam, Cambridge, UK                            | Ab126751  | 1:500  | WB  |
|                    |                                     |        |                                                 |           | 1:50   | IHC |
| IDO                | Anti-IDO antibody                   | Rabbit | LS-Bio, Seattle, WA, USA                        | LS-B13596 | 1:500  | WB  |
| IDO                | Anti-IDO antibody                   | Rabbit | Thermo Fisher Scientific, Waltham, MA, USA      | PA5-79437 | 1:50   | IHC |
| TPH                | Anti-TPH antibody                   | Rabbit | Thermo Fisher Scientific, Waltham, MA, USA      | PAI-777   | 1:100  | WB  |
|                    |                                     |        |                                                 |           | 1:50   | IHC |
| Secondary antibody | Anti-rabbit Immunoglobulins/HRP     | Swine  | Dako, Carpinteria, CA, USA                      | P0217     | 1:2000 | WB  |
| Reference protein  |                                     |        |                                                 |           |        |     |
| $\beta$ -actin     | Anti-beta actin antibody            | Mouse  | Abcam, Cambridge, UK                            | Ab8226    | 1:1000 | WB  |
| Secondary antibody | Anti-mouse Immunoglobulins/HRP      | Rabbit | Dako, Carpinteria, CA, USA                      | P0260     | 1:2000 | WB  |
